# Supplementary material for: An in situ solid-state heredity-restriction strategy to introduce oxygen defects into TiO2 with enhanced photocatalytic performance
Source: Royal Society of Chemistry journal article supplement (doi:10.1039/c8ce01267a), 2018-01-01
Supplement: c8ce01267a1.pdf [file c8ce01267a1.pdf]

Supporting information for

## An *in-situ* solid-state heredity-restriction strategy to introduce oxygen defects into TiO<sub>2</sub> with enhanced photocatalytic performance

Jindou Hu, Wei Jia, Jing Xie, Yali Cao\*, Xinhua Zhang, Dianzeng Jia\*

Key Laboratory of Energy Materials Chemistry, Ministry of Education, Key Laboratory of Advanced Functional Materials, Autonomous Region, Institute of Applied Chemistry, Xinjiang University, Urumqi, Xinjiang 830046, China

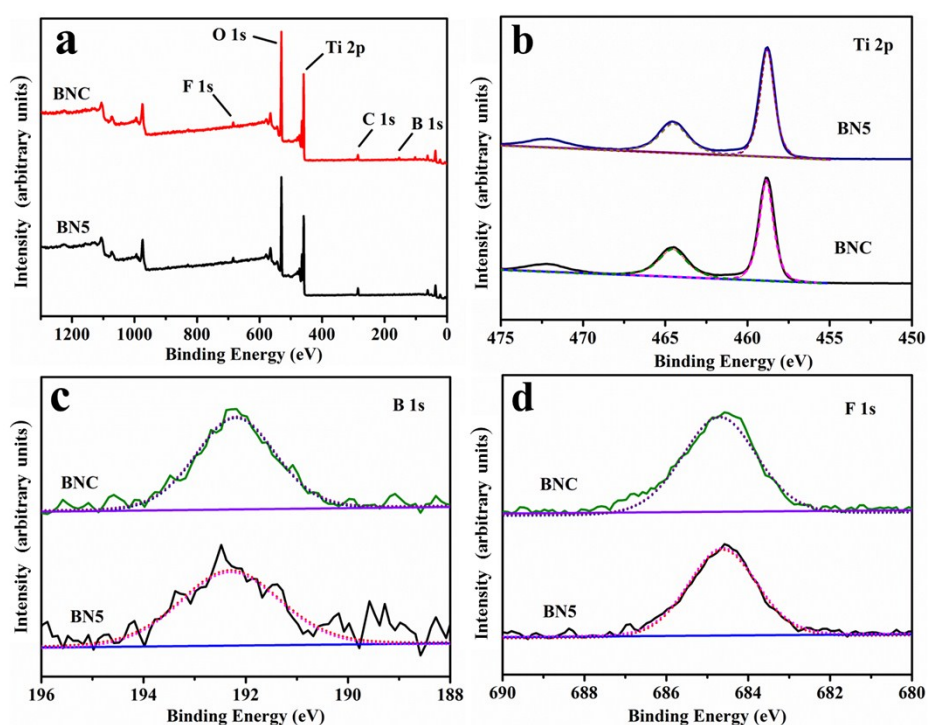

Fig. S1 the XPS spectrum of Ti 2p, B 1s and F 1s in BN5 and BNC.

Fig. S1 is the XPS spectrum of Ti 2p, B 1s and F1s in BN5 and BNC. It can be seen in Fig. S1a that Ti, O, B, F and C elements were contained in both BN5 and BNC, the C element maybe come from the CO<sub>2</sub> of air. The peaks of Ti, B and F in BNC and BN5 all don't show an obvious difference in their XPS spectrum.

Tab. S1 the atomic percentage of the obtained samples BN5 and BNC.

| Element | Atomic percentage from XPS (%) |       | Atomic percentage from EDX (%) |       |
|---------|--------------------------------|-------|--------------------------------|-------|
|         | BN5                            | BNC   | BN5                            | BNC   |
| Ti      | 31.25                          | 26.91 | 26.89                          | 23.13 |
| O       | 64.1                           | 66.23 | 67.63                          | 69.66 |
| F       | 3.3                            | 3.49  | 2.88                           | 2.37  |
| B       | 1.35                           | 3.38  | 2.59                           | 4.84  |

Tab. S2 the area percentage of the O 1s on BN5 and BNC.

|                 | BN5              |                   | BNC              |                   |
|-----------------|------------------|-------------------|------------------|-------------------|
|                 | Area CPS<br>(eV) | Area Ratio<br>(%) | Area CPS<br>(eV) | Area Ratio<br>(%) |
| Lattice oxygen  | 117245           | 88.2              | 117383           | 77.7              |
| Chemical oxygen | 9737             | 7.3               | 18674            | 12.4              |
| Adsorbed oxygen | 5956             | 4.5               | 15027            | 9.9               |

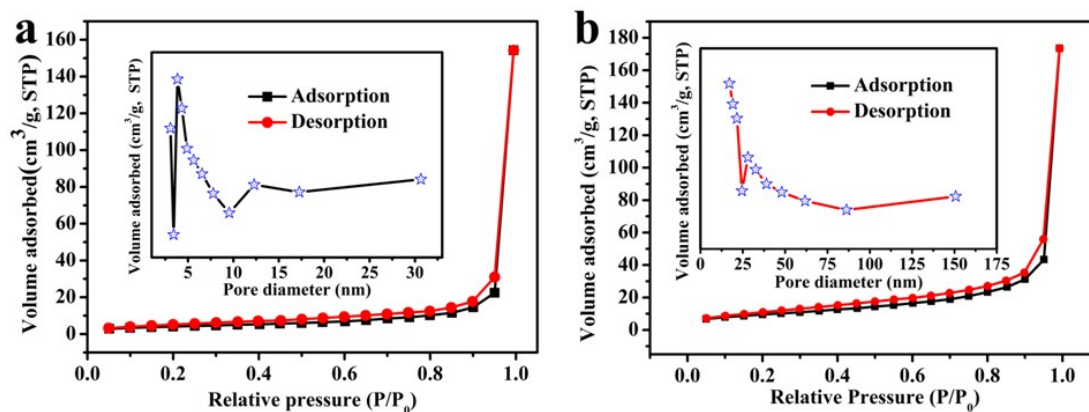

Fig. S2 the isothermal adsorption/desorption curve of BN5 and BNC (inset: the pore size distribution).

Tab. S3 the surface area of the as-obtained samples.

| Samples                                           | BN5    | BNC    |
|---------------------------------------------------|--------|--------|
| Surface area ( $\text{m}^2 \cdot \text{g}^{-1}$ ) | 14.846 | 34.295 |
| Pore diameter (nm)                                | 2.769  | 14.483 |
| Pore volume ( $\text{cm}^3 \cdot \text{g}^{-1}$ ) | 0.044  | 0.080  |

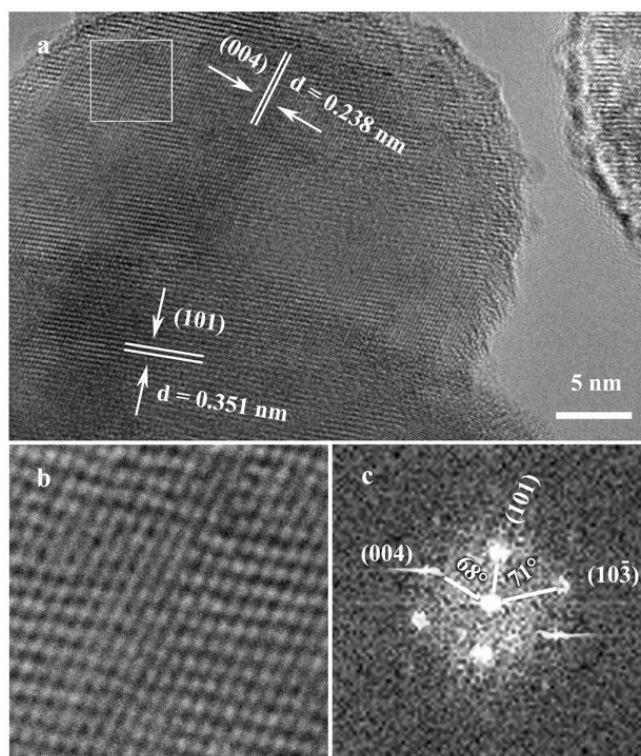

Fig. S3 the high-resolution TEM image (a, b) and the SAED images (c) of BNC.

Fig. S4 is the HRTEM of the obtained BNC. It can be seen from the marked parts of fig. S4c that the lattice fringes are discontinuous, the appeared intermittent lattice streaks indicates the existence of defects. The defects maybe caused by the introduced oxygen vacancies. 0.190 nm in fig. S4b is the lattice fringes spacing(100) face. Fig. S4d is the lattice fringes images obtained from the edge area of the nanoparticles. The amorphous regions in the marked places of fig. S4d may be caused

by defects or the incomplete growth of crystal.

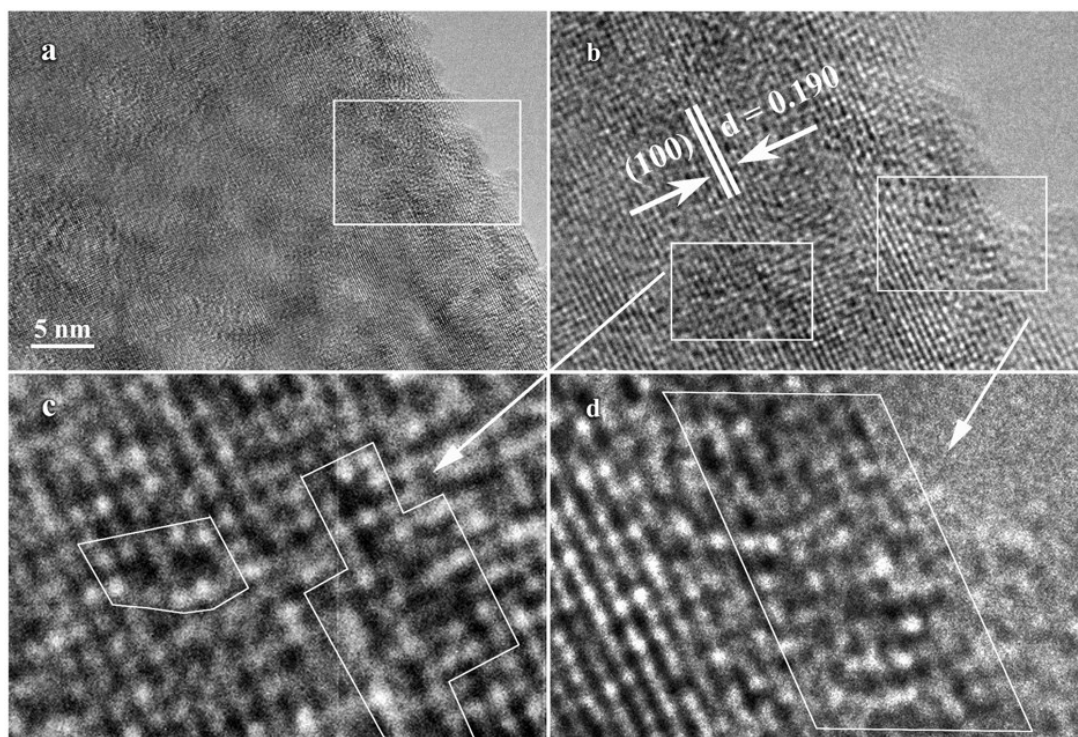

Fig. S4. The HRTEM images of sample BNC (a) and its magnification images (b-d)

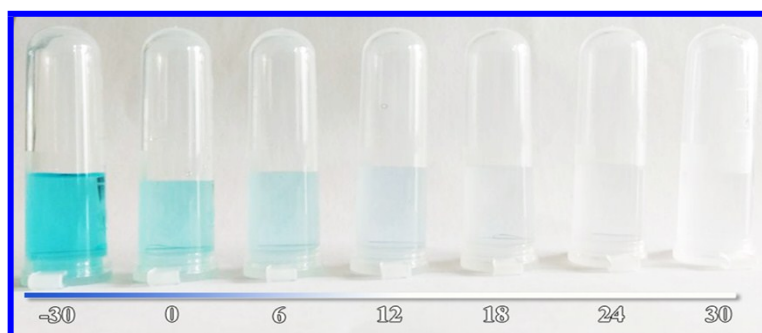

Fig. S5 the photographs of MB solutions for different photocatalytic reaction time of sample BNC after 15 months storage in air.

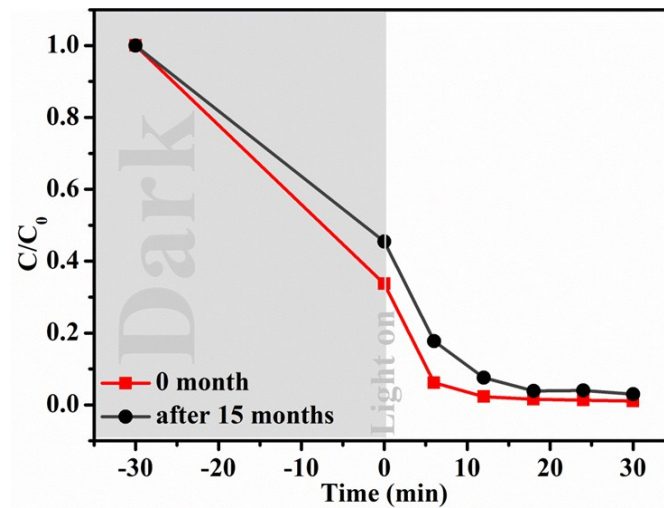

Fig. S6 the photocatalytic degradation of BNC before and after 15 months storage in air.
